# Supplementary material for: Identification of Fish Species and Toxins Implicated in a Snapper Food Poisoning Event in Sabah, Malaysia, 2017
Source: MDPI journal article supplement (doi:10.3390/toxins13090657), 2021-09-15
Supplement: s1 [file s1]

# Supplementary Materials: Identification of Fish Species and Toxins Implicated in a Snapper Food Poisoning Event in Sabah, Malaysia, 2017

Ha Viet Dao, Aya Uesugi, Hajime Uchida, Ryuichi Watanabe, Ryoji Matsushima, Zhen Fei Lim, Steffiana J. Jipani, Ky Xuan Pham, Minh-Thu Phan, Chui Pin Leaw, Po Teen Lim and Toshiyuki Suzuki

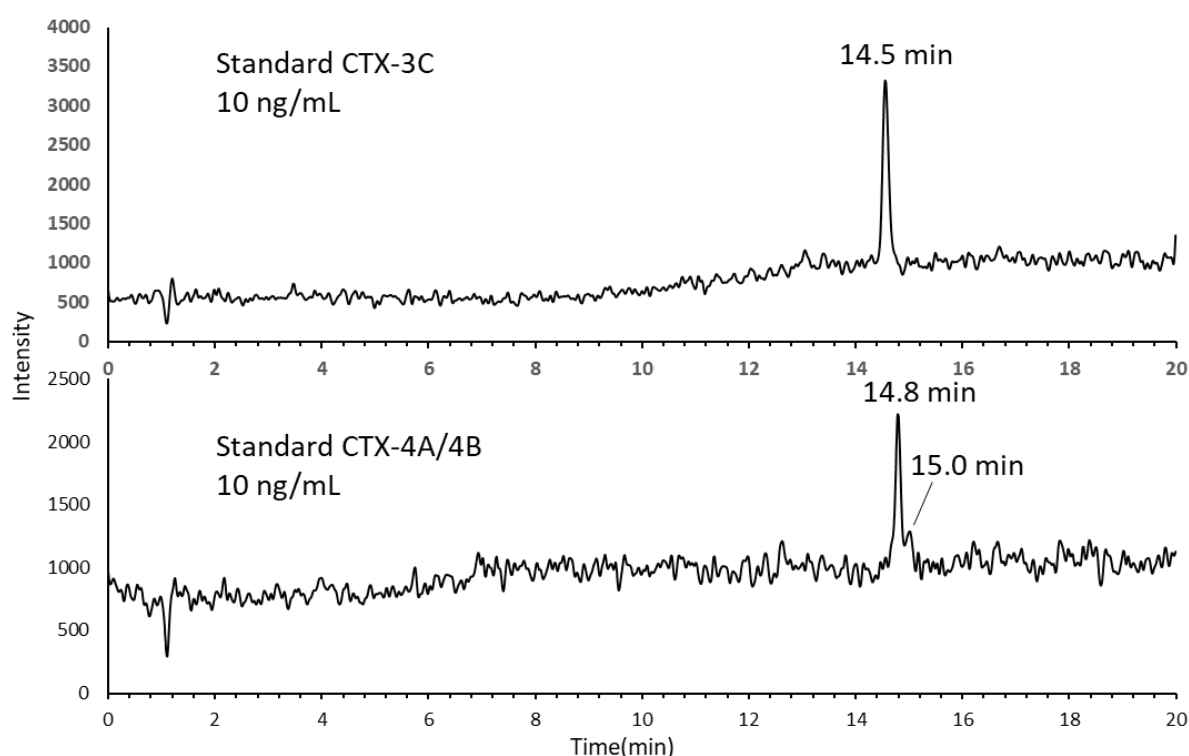

**Figure S1.** The SIM LC/MS chromatograms for  $[M+Na]^+$  of standard CTX-3C (above) and CTX-4A/4B (below).

**Table S1.** Intraspecific pairwise genetic distances of *Lutjanus argentimaculatus*.

|                           | GU673900Largenti-<br>maculatus | Head3   | GU673901Largenti-<br>maculatus | Head5   | JF493820Largenti-<br>maculatus | JN021224Largenti-<br>maculatus |
|---------------------------|--------------------------------|---------|--------------------------------|---------|--------------------------------|--------------------------------|
| GU673900Largentimaculatus |                                |         |                                |         |                                |                                |
| Head3                     | 0.003273322                    |         |                                |         |                                |                                |
| GU673901Largentimaculatus | 0.001636661                    | 0.00491 |                                |         |                                |                                |
| Head5                     | 0.003273322                    | 0       | 0.00491                        |         |                                |                                |
| JF493820Largentimaculatus | 0.001636661                    | 0.00491 | 0.003273                       | 0.00491 |                                |                                |
| JN021224Largentimaculatus | 0.001636661                    | 0.00491 | 0.003273                       | 0.00491 | 0.003273322                    |                                |
| JN021223Largentimaculatus | 0.001636661                    | 0.00491 | 0.003273                       | 0.00491 | 0.003273322                    | 0.003273                       |

**Table S2.** Intraspecific pairwise genetic distances of *Lutjanus bohar*.

|                | MN870347Lbohar | Head4        | Head1        | GU673902Lbohar | Head2        | GU673839Lbohar | MN870358Lbohar |
|----------------|----------------|--------------|--------------|----------------|--------------|----------------|----------------|
| MN870347Lbohar |                |              |              |                |              |                |                |
| Head4          | 0.0000000000   |              |              |                |              |                |                |
| Head1          | 0.0000000000   | 0.0000000000 |              |                |              |                |                |
| GU673902Lbohar | 0.0000000000   | 0.0000000000 | 0.0000000000 |                |              |                |                |
| Head2          | 0.0196721311   | 0.0196721311 | 0.0196721311 | 0.0196721311   |              |                |                |
| GU673839Lbohar | 0.0016366612   | 0.0016366612 | 0.0016366612 | 0.0016366612   | 0.0213114754 |                |                |
| MN870358Lbohar | 0.0016366612   | 0.0016366612 | 0.0016366612 | 0.0016366612   | 0.0213114754 | 0.0000000000   |                |
| MN870523Lbohar | 0.0065466448   | 0.0065466448 | 0.0065466448 | 0.0065466448   | 0.0262295082 | 0.0081833061   | 0.0081833061   |
